# Supplementary material for: A neutron spin echo study of low-temperature water confined in the spherical silica pores of SBA-16
Source: Royal Society of Chemistry journal article supplement (doi:10.1039/c6cp08047b), 2017-01-01

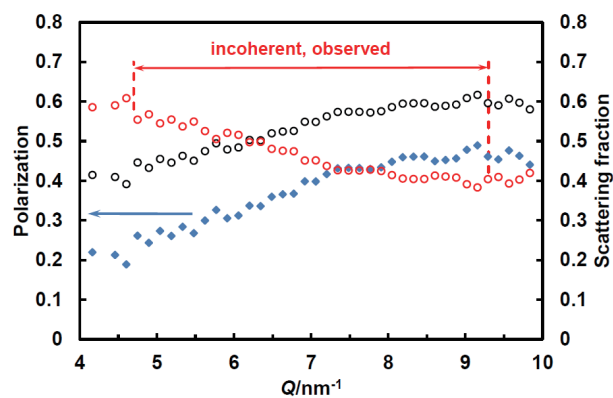

Figure S1. Instrumental efficiency of NSE scattering for coherent and incoherent scattering for the system SBA-16/H<sub>2</sub>O. For incoherent scattering with H<sub>2</sub>O measurements were conducted in the range 4.7-9.3 nm<sup>-1</sup>.

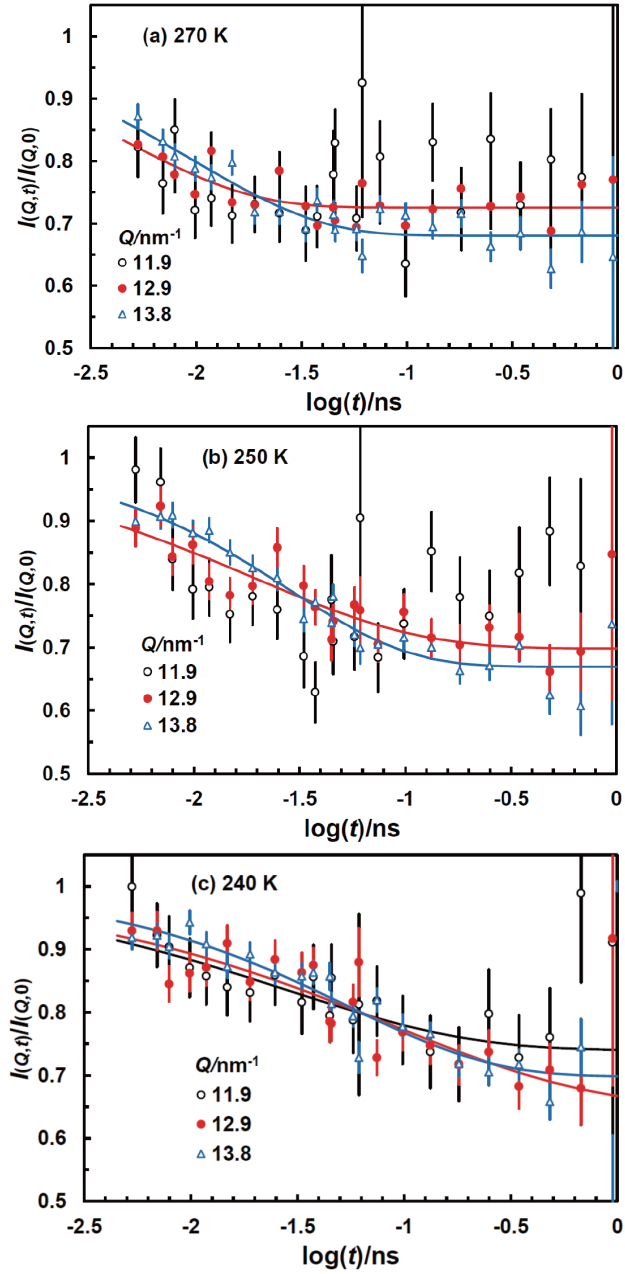

Figure S2. NISF-FT relations of  $D_2O$  confined in SBA-16 were determined for  $Q = 11.9, 12.9, 13.8 \text{ nm}^{-1}$  at temperatures (a) 270, (b) 250, and (c) 240 K.

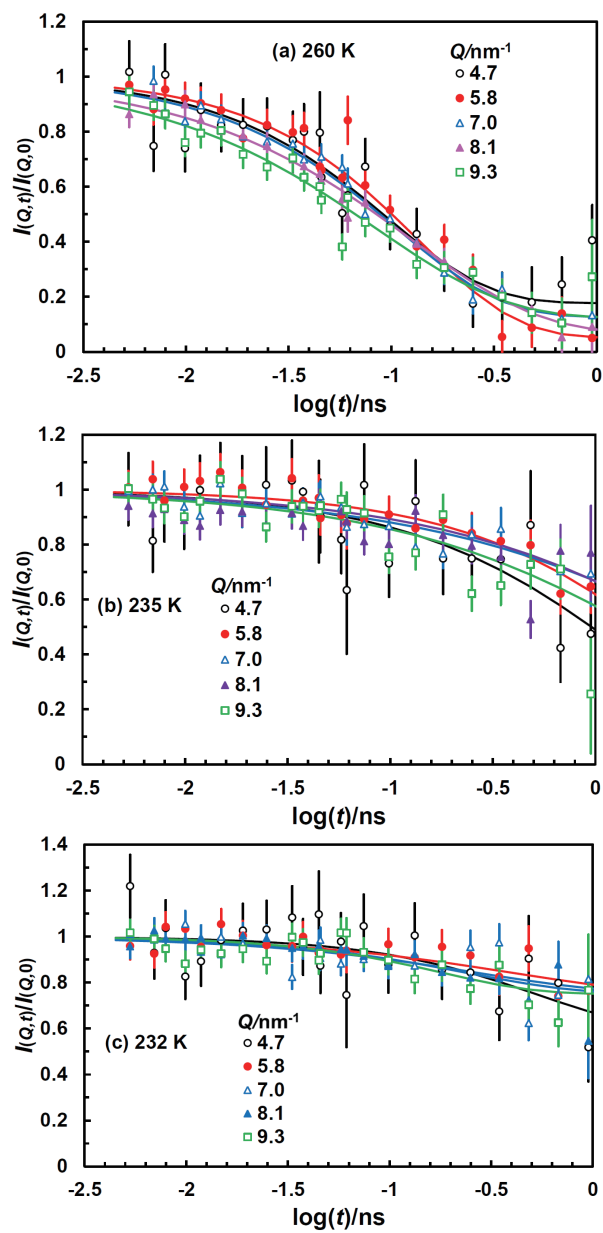

Figure S3. NISF-FT relations of H<sub>2</sub>O confined in SBA-16 were determined for  $Q = 4.7, 5.8, 7.0, 8.1,$  and  $9.3 \text{ nm}^{-1}$  at temperatures (a) 260, (c) 235, (c) 232, (d) 225 K and after warming up to 245 K.

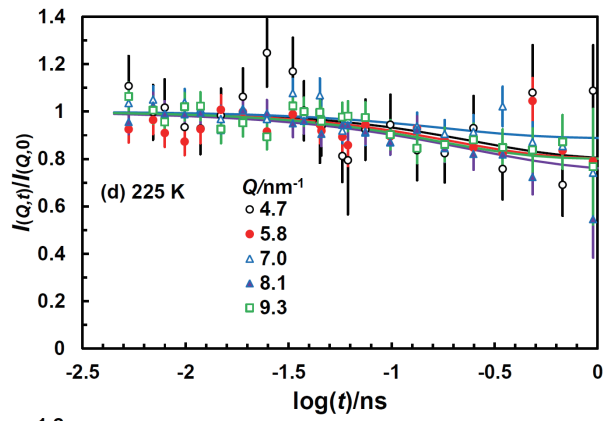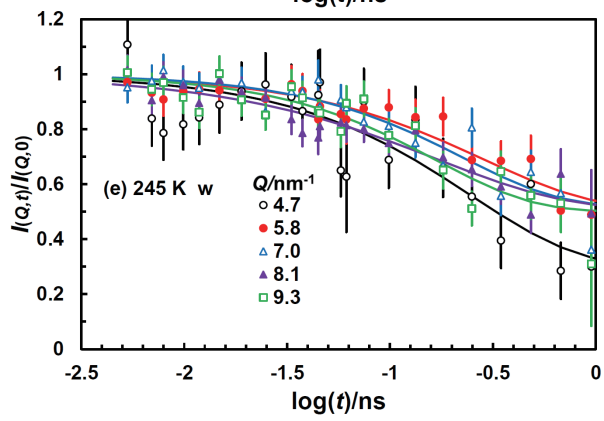

Supplement: c6cp08047b1.pdf [file c6cp08047b1.pdf]
